# Supplementary material for: Variation of the Orientations of Organic Structure-Directing Agents inside the Channels of SCM-14 and SCM-15 Germanosilicates Obtained by Ab Initio Molecular Dynamic Simulations
Source: MDPI journal article supplement (doi:10.3390/nano14020159), 2024-01-11
Supplement: s1 [file s1]

## Supporting information

### **Variation of the orientations of organic structure-directing agents inside the channels of SCM-14 and SCM-15 germanosilicates obtained by ab initio molecular dynamic simulations**

Stoyan P. Gramatikov,<sup>1</sup> Petko St. Petkov,<sup>1</sup> Zhendong Wang,<sup>2</sup> Weimin Yang,<sup>2</sup> Georgi N. Vayssilov<sup>1,\*</sup>

<sup>1</sup> *Faculty of Chemistry and Pharmacy, University of Sofia, 1126 Sofia, Bulgaria*

<sup>2</sup> *State Key Laboratory of Green Chemical Engineering and Industrial Catalysis; Sinopec Shanghai Research Institute of Petrochemical Technology Co. Ltd., 1658 North Pudong Rd., Pudong, Shanghai 201208, China*

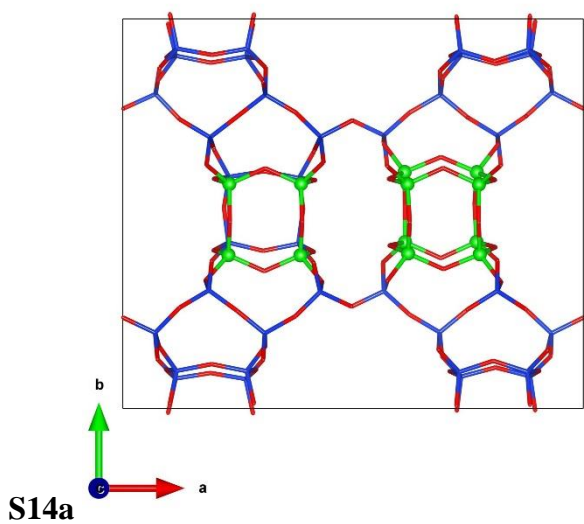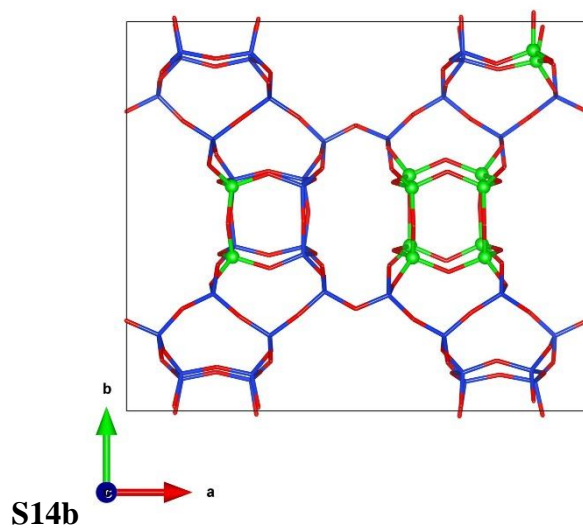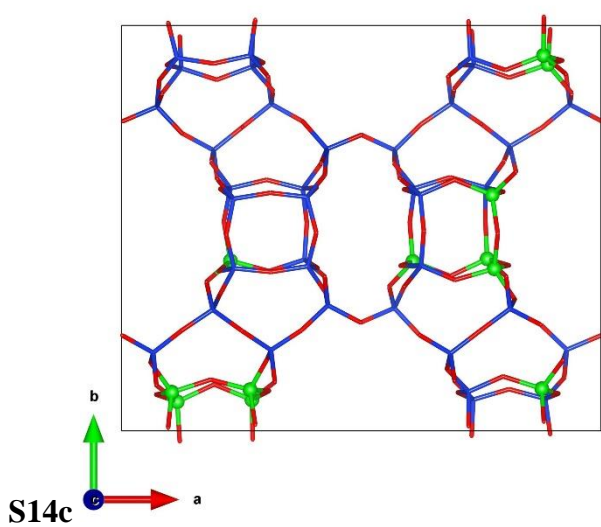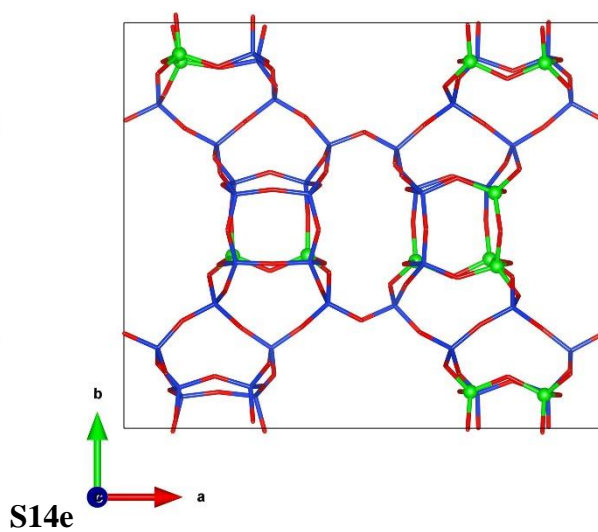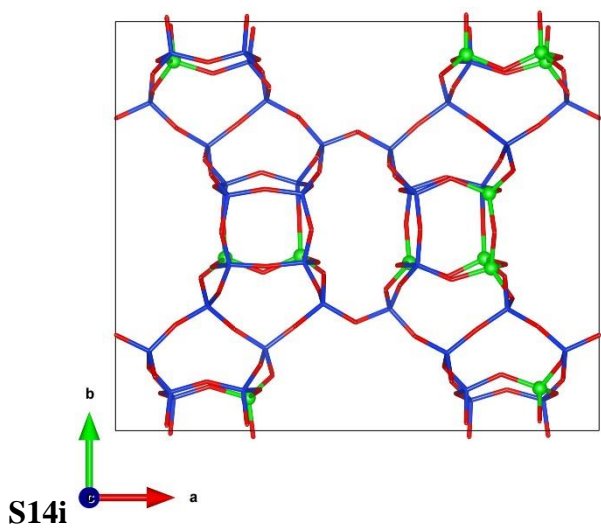

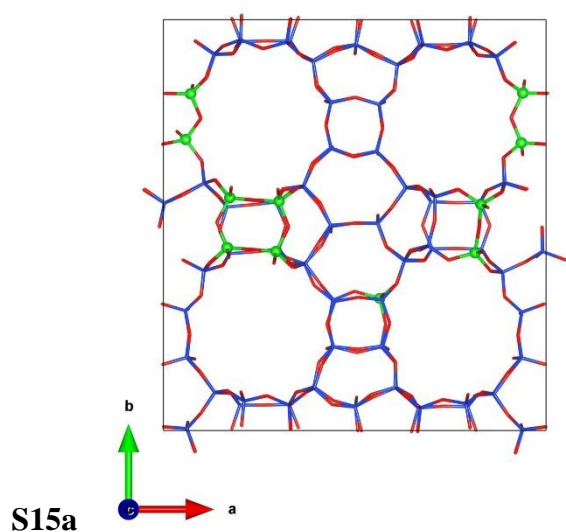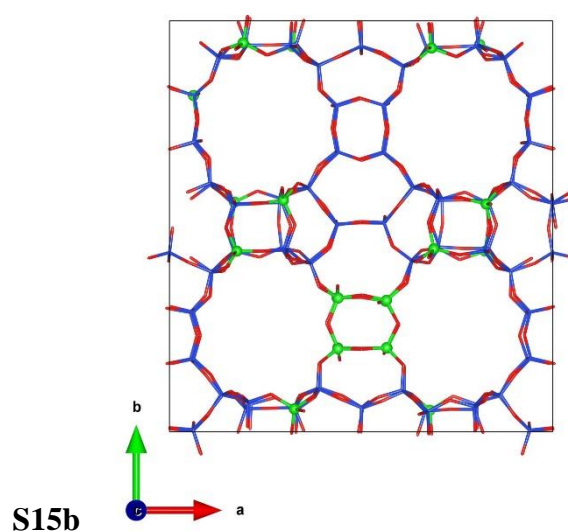

**Figure S1.** Structure of the SCM-14 and SCM-15 germanosilicate models with different germanium distribution used for ab initio molecular dynamic simulations.

**Table S1.** Calculated vibrational frequencies of the first 250 modes in S14a\_4 and S14c\_6 models obtained after initial geometry optimization (Opt) and after MD simulations (MD), the difference between values after MD simulation and from optimization, as well as the average differences for the two models. The values are in  $\text{cm}^{-1}$  and are not scaled.

| Mode No | S14a_4 |      |        |  | S14c_6 |      |        | Average (MD-Opt) |
|---------|--------|------|--------|--|--------|------|--------|------------------|
|         | Opt    | MD   | MD-Opt |  | Opt    | MD   | MD-Opt |                  |
| 1       | 3665   | 3745 | -80    |  | 3742   | 3667 | 75     | -2               |
| 2       | 3665   | 3738 | -74    |  | 3742   | 3635 | 107    | 17               |
| 3       | 3583   | 3634 | -52    |  | 3561   | 3598 | -37    | -44              |
| 4       | 3582   | 3623 | -41    |  | 3560   | 3582 | -22    | -32              |
| 5       | 3469   | 3524 | -55    |  | 3494   | 3504 | -11    | -33              |
| 6       | 3469   | 3489 | -21    |  | 3493   | 3429 | 65     | 22               |
| 7       | 3238   | 3451 | -213   |  | 3225   | 3268 | -43    | -128             |
| 8       | 3238   | 3361 | -123   |  | 3224   | 3209 | 16     | -54              |
| 9       | 3201   | 3202 | 0      |  | 3203   | 3196 | 7      | 3                |
| 10      | 3201   | 3200 | 1      |  | 3203   | 3196 | 7      | 4                |
| 11      | 3187   | 3198 | -10    |  | 3194   | 3193 | 1      | -5               |
| 12      | 3187   | 3187 | 0      |  | 3194   | 3187 | 7      | 3                |
| 13      | 3175   | 3175 | 0      |  | 3177   | 3185 | -8     | -4               |
| 14      | 3175   | 3174 | 1      |  | 3177   | 3184 | -7     | -3               |
| 15      | 3172   | 3172 | -1     |  | 3177   | 3181 | -5     | -3               |
| 16      | 3172   | 3172 | 0      |  | 3177   | 3181 | -4     | -2               |
| 17      | 3171   | 3169 | 2      |  | 3172   | 3179 | -7     | -2               |
| 18      | 3171   | 3168 | 4      |  | 3172   | 3177 | -5     | -1               |
| 19      | 3166   | 3154 | 12     |  | 3172   | 3177 | -5     | 3                |
| 20      | 3166   | 3153 | 13     |  | 3171   | 3170 | 1      | 7                |
| 21      | 3156   | 3147 | 9      |  | 3164   | 3166 | -2     | 3                |
| 22      | 3156   | 3146 | 10     |  | 3164   | 3159 | 6      | 8                |
| 23      | 3152   | 3138 | 14     |  | 3162   | 3156 | 6      | 10               |
| 24      | 3152   | 3135 | 16     |  | 3162   | 3145 | 18     | 17               |
| 25      | 3122   | 3075 | 47     |  | 3101   | 3085 | 16     | 32               |
| 26      | 3122   | 3067 | 55     |  | 3101   | 3077 | 23     | 39               |
| 27      | 3094   | 3063 | 31     |  | 3094   | 3072 | 21     | 26               |
| 28      | 3094   | 3059 | 35     |  | 3093   | 3070 | 24     | 29               |

|    |      |      |     |  |      |      |     |    |
|----|------|------|-----|--|------|------|-----|----|
| 29 | 3080 | 3057 | 24  |  | 3088 | 3064 | 24  | 24 |
| 30 | 3080 | 3053 | 28  |  | 3088 | 3062 | 26  | 27 |
| 31 | 3078 | 3052 | 25  |  | 3081 | 3061 | 20  | 23 |
| 32 | 3077 | 3052 | 26  |  | 3081 | 3058 | 23  | 24 |
| 33 | 3048 | 3030 | 18  |  | 3045 | 3045 | 1   | 10 |
| 34 | 3048 | 3029 | 19  |  | 3045 | 3044 | 1   | 10 |
| 35 | 3036 | 3029 | 8   |  | 3033 | 3031 | 2   | 5  |
| 36 | 3036 | 3027 | 9   |  | 3033 | 3026 | 7   | 8  |
| 37 | 3027 | 3025 | 2   |  | 3031 | 3024 | 7   | 4  |
| 38 | 3027 | 3016 | 11  |  | 3031 | 3023 | 8   | 9  |
| 39 | 3026 | 3008 | 18  |  | 3023 | 3019 | 4   | 11 |
| 40 | 3026 | 3005 | 21  |  | 3023 | 3018 | 5   | 13 |
| 41 | 3019 | 2992 | 27  |  | 3020 | 3015 | 5   | 16 |
| 42 | 3019 | 2992 | 27  |  | 3020 | 3011 | 9   | 18 |
| 43 | 3015 | 2990 | 25  |  | 3012 | 3008 | 3   | 14 |
| 44 | 3015 | 2988 | 27  |  | 3011 | 3006 | 5   | 16 |
| 45 | 3014 | 2985 | 28  |  | 3010 | 3003 | 7   | 17 |
| 46 | 3014 | 2983 | 31  |  | 3010 | 3002 | 8   | 19 |
| 47 | 2999 | 2980 | 19  |  | 2997 | 2991 | 5   | 12 |
| 48 | 2999 | 2980 | 19  |  | 2997 | 2989 | 7   | 13 |
| 49 | 2973 | 2977 | -4  |  | 2995 | 2987 | 7   | 2  |
| 50 | 2973 | 2958 | 15  |  | 2995 | 2974 | 21  | 18 |
| 51 | 2960 | 2956 | 4   |  | 2988 | 2974 | 15  | 10 |
| 52 | 2960 | 2953 | 7   |  | 2988 | 2972 | 17  | 12 |
| 53 | 2940 | 2948 | -7  |  | 2966 | 2969 | -3  | -5 |
| 54 | 2940 | 2938 | 2   |  | 2966 | 2955 | 11  | 6  |
| 55 | 2927 | 2938 | -11 |  | 2959 | 2944 | 15  | 2  |
| 56 | 2926 | 2935 | -8  |  | 2959 | 2940 | 18  | 5  |
| 57 | 1653 | 1651 | 1   |  | 1655 | 1649 | 5   | 3  |
| 58 | 1652 | 1650 | 2   |  | 1652 | 1645 | 7   | 5  |
| 59 | 1650 | 1646 | 4   |  | 1651 | 1643 | 8   | 6  |
| 60 | 1649 | 1645 | 4   |  | 1648 | 1642 | 6   | 5  |
| 61 | 1633 | 1602 | 30  |  | 1618 | 1630 | -11 | 10 |

|    |      |      |    |      |      |     |    |
|----|------|------|----|------|------|-----|----|
| 62 | 1633 | 1565 | 67 | 1618 | 1628 | -10 | 29 |
| 63 | 1582 | 1564 | 18 | 1585 | 1585 | -1  | 8  |
| 64 | 1582 | 1564 | 18 | 1584 | 1583 | 1   | 10 |
| 65 | 1578 | 1562 | 16 | 1574 | 1575 | -1  | 8  |
| 66 | 1578 | 1562 | 16 | 1574 | 1564 | 11  | 13 |
| 67 | 1564 | 1560 | 4  | 1566 | 1560 | 6   | 5  |
| 68 | 1563 | 1554 | 10 | 1564 | 1551 | 13  | 11 |
| 69 | 1562 | 1546 | 16 | 1558 | 1545 | 13  | 15 |
| 70 | 1561 | 1546 | 15 | 1557 | 1544 | 13  | 14 |
| 71 | 1510 | 1510 | 0  | 1513 | 1508 | 4   | 2  |
| 72 | 1510 | 1509 | 1  | 1513 | 1508 | 5   | 3  |
| 73 | 1507 | 1504 | 3  | 1508 | 1507 | 1   | 2  |
| 74 | 1507 | 1503 | 4  | 1508 | 1501 | 7   | 5  |
| 75 | 1462 | 1466 | -4 | 1469 | 1474 | -5  | -5 |
| 76 | 1461 | 1466 | -5 | 1468 | 1473 | -5  | -5 |
| 77 | 1461 | 1463 | -3 | 1467 | 1471 | -4  | -3 |
| 78 | 1460 | 1462 | -2 | 1466 | 1464 | 2   | 0  |
| 79 | 1453 | 1455 | -2 | 1459 | 1460 | -1  | -1 |
| 80 | 1453 | 1454 | -1 | 1459 | 1459 | 0   | -1 |
| 81 | 1448 | 1450 | -2 | 1454 | 1457 | -3  | -2 |
| 82 | 1448 | 1449 | -1 | 1454 | 1455 | -1  | -1 |
| 83 | 1440 | 1442 | -2 | 1445 | 1453 | -7  | -5 |
| 84 | 1440 | 1441 | -2 | 1445 | 1451 | -6  | -4 |
| 85 | 1436 | 1441 | -5 | 1445 | 1448 | -3  | -4 |
| 86 | 1436 | 1440 | -4 | 1444 | 1447 | -3  | -3 |
| 87 | 1435 | 1439 | -4 | 1434 | 1447 | -13 | -9 |
| 88 | 1434 | 1436 | -2 | 1434 | 1446 | -13 | -7 |
| 89 | 1428 | 1436 | -8 | 1434 | 1444 | -10 | -9 |
| 90 | 1428 | 1435 | -7 | 1433 | 1440 | -8  | -7 |
| 91 | 1427 | 1421 | 6  | 1430 | 1425 | 5   | 6  |
| 92 | 1426 | 1417 | 9  | 1430 | 1423 | 7   | 8  |
| 93 | 1421 | 1413 | 8  | 1423 | 1416 | 7   | 7  |
| 94 | 1421 | 1410 | 10 | 1422 | 1415 | 7   | 8  |

|     |      |      |    |  |      |      |    |    |
|-----|------|------|----|--|------|------|----|----|
| 95  | 1417 | 1410 | 7  |  | 1416 | 1415 | 1  | 4  |
| 96  | 1417 | 1407 | 9  |  | 1416 | 1412 | 4  | 7  |
| 97  | 1416 | 1407 | 9  |  | 1415 | 1409 | 7  | 8  |
| 98  | 1415 | 1405 | 11 |  | 1415 | 1407 | 8  | 9  |
| 99  | 1344 | 1339 | 5  |  | 1350 | 1341 | 9  | 7  |
| 100 | 1344 | 1338 | 6  |  | 1350 | 1339 | 10 | 8  |
| 101 | 1338 | 1335 | 3  |  | 1342 | 1339 | 3  | 3  |
| 102 | 1338 | 1335 | 3  |  | 1341 | 1334 | 7  | 5  |
| 103 | 1337 | 1333 | 3  |  | 1339 | 1334 | 5  | 4  |
| 104 | 1337 | 1333 | 4  |  | 1338 | 1333 | 5  | 5  |
| 105 | 1333 | 1332 | 1  |  | 1335 | 1330 | 6  | 3  |
| 106 | 1332 | 1328 | 4  |  | 1335 | 1326 | 10 | 7  |
| 107 | 1308 | 1307 | 1  |  | 1314 | 1315 | -1 | 0  |
| 108 | 1308 | 1306 | 1  |  | 1314 | 1307 | 6  | 4  |
| 109 | 1306 | 1306 | 0  |  | 1311 | 1306 | 5  | 2  |
| 110 | 1305 | 1303 | 2  |  | 1310 | 1305 | 6  | 4  |
| 111 | 1305 | 1303 | 2  |  | 1309 | 1304 | 5  | 4  |
| 112 | 1304 | 1301 | 3  |  | 1308 | 1302 | 7  | 5  |
| 113 | 1302 | 1301 | 1  |  | 1299 | 1300 | -1 | 0  |
| 114 | 1302 | 1300 | 2  |  | 1299 | 1298 | 1  | 1  |
| 115 | 1290 | 1284 | 6  |  | 1292 | 1287 | 6  | 6  |
| 116 | 1290 | 1284 | 6  |  | 1292 | 1282 | 10 | 8  |
| 117 | 1281 | 1281 | -1 |  | 1291 | 1282 | 9  | 4  |
| 118 | 1281 | 1278 | 3  |  | 1291 | 1277 | 14 | 8  |
| 119 | 1270 | 1252 | 18 |  | 1282 | 1277 | 5  | 12 |
| 120 | 1270 | 1247 | 23 |  | 1281 | 1275 | 6  | 15 |
| 121 | 1265 | 1244 | 21 |  | 1272 | 1271 | 1  | 11 |
| 122 | 1265 | 1244 | 21 |  | 1272 | 1250 | 22 | 22 |
| 123 | 1249 | 1242 | 6  |  | 1262 | 1248 | 14 | 10 |
| 124 | 1248 | 1242 | 6  |  | 1261 | 1248 | 13 | 10 |
| 125 | 1247 | 1241 | 6  |  | 1246 | 1244 | 3  | 4  |
| 126 | 1246 | 1237 | 9  |  | 1246 | 1235 | 11 | 10 |
| 127 | 1217 | 1218 | -2 |  | 1225 | 1219 | 6  | 2  |

|     |      |      |    |  |      |      |    |    |
|-----|------|------|----|--|------|------|----|----|
| 128 | 1215 | 1216 | -2 |  | 1224 | 1218 | 6  | 2  |
| 129 | 1214 | 1215 | -2 |  | 1223 | 1217 | 6  | 2  |
| 130 | 1213 | 1214 | -1 |  | 1222 | 1215 | 7  | 3  |
| 131 | 1209 | 1209 | 0  |  | 1215 | 1213 | 1  | 1  |
| 132 | 1208 | 1206 | 2  |  | 1213 | 1209 | 4  | 3  |
| 133 | 1206 | 1198 | 8  |  | 1209 | 1206 | 3  | 6  |
| 134 | 1204 | 1197 | 6  |  | 1208 | 1204 | 4  | 5  |
| 135 | 1176 | 1169 | 8  |  | 1187 | 1172 | 16 | 12 |
| 136 | 1176 | 1167 | 9  |  | 1187 | 1170 | 17 | 13 |
| 137 | 1174 | 1165 | 9  |  | 1176 | 1169 | 7  | 8  |
| 138 | 1174 | 1164 | 10 |  | 1176 | 1166 | 10 | 10 |
| 139 | 1165 | 1162 | 3  |  | 1176 | 1163 | 13 | 8  |
| 140 | 1165 | 1161 | 4  |  | 1175 | 1163 | 13 | 8  |
| 141 | 1158 | 1158 | -1 |  | 1172 | 1163 | 9  | 4  |
| 142 | 1157 | 1155 | 3  |  | 1171 | 1157 | 14 | 8  |
| 143 | 1144 | 1140 | 4  |  | 1145 | 1141 | 4  | 4  |
| 144 | 1143 | 1138 | 5  |  | 1145 | 1140 | 4  | 5  |
| 145 | 1137 | 1138 | -1 |  | 1141 | 1137 | 4  | 2  |
| 146 | 1136 | 1137 | 0  |  | 1140 | 1137 | 4  | 2  |
| 147 | 1103 | 1098 | 4  |  | 1108 | 1103 | 5  | 4  |
| 148 | 1103 | 1096 | 7  |  | 1108 | 1101 | 6  | 7  |
| 149 | 1096 | 1096 | 1  |  | 1103 | 1099 | 4  | 2  |
| 150 | 1096 | 1096 | 0  |  | 1102 | 1093 | 9  | 5  |
| 151 | 1089 | 1094 | -5 |  | 1095 | 1093 | 3  | -1 |
| 152 | 1089 | 1090 | -1 |  | 1094 | 1089 | 5  | 2  |
| 153 | 1083 | 1089 | -6 |  | 1084 | 1089 | -5 | -5 |
| 154 | 1083 | 1086 | -2 |  | 1084 | 1084 | 0  | -1 |
| 155 | 1068 | 1055 | 13 |  | 1081 | 1064 | 17 | 15 |
| 156 | 1067 | 1052 | 15 |  | 1080 | 1060 | 20 | 18 |
| 157 | 1050 | 1047 | 3  |  | 1073 | 1058 | 15 | 9  |
| 158 | 1048 | 1043 | 6  |  | 1072 | 1056 | 16 | 11 |
| 159 | 1043 | 1038 | 5  |  | 1050 | 1048 | 2  | 3  |
| 160 | 1043 | 1034 | 9  |  | 1050 | 1046 | 4  | 6  |



|     |      |      |    |  |      |      |     |     |
|-----|------|------|----|--|------|------|-----|-----|
| 161 | 1034 | 1034 | -1 |  | 1044 | 1044 | 0   | 0   |
| 162 | 1033 | 1032 | 0  |  | 1044 | 1043 | 1   | 1   |
| 163 | 1013 | 993  | 20 |  | 1014 | 994  | 20  | 20  |
| 164 | 1011 | 991  | 20 |  | 1011 | 994  | 17  | 18  |
| 165 | 992  | 991  | 1  |  | 1004 | 993  | 11  | 6   |
| 166 | 991  | 988  | 3  |  | 1002 | 989  | 14  | 8   |
| 167 | 990  | 980  | 11 |  | 994  | 987  | 7   | 9   |
| 168 | 990  | 973  | 17 |  | 993  | 982  | 11  | 14  |
| 169 | 983  | 973  | 10 |  | 992  | 978  | 14  | 12  |
| 170 | 980  | 972  | 8  |  | 992  | 978  | 14  | 11  |
| 171 | 978  | 971  | 8  |  | 983  | 977  | 6   | 7   |
| 172 | 977  | 968  | 9  |  | 982  | 977  | 5   | 7   |
| 173 | 968  | 964  | 4  |  | 973  | 971  | 2   | 3   |
| 174 | 966  | 963  | 3  |  | 973  | 968  | 6   | 4   |
| 175 | 963  | 961  | 3  |  | 968  | 966  | 1   | 2   |
| 176 | 963  | 959  | 4  |  | 968  | 962  | 6   | 5   |
| 177 | 963  | 959  | 4  |  | 964  | 960  | 4   | 4   |
| 178 | 962  | 958  | 4  |  | 964  | 960  | 5   | 4   |
| 179 | 955  | 956  | -1 |  | 960  | 958  | 2   | 1   |
| 180 | 955  | 955  | -1 |  | 959  | 955  | 4   | 1   |
| 181 | 953  | 955  | -1 |  | 956  | 954  | 2   | 0   |
| 182 | 953  | 952  | 1  |  | 955  | 953  | 3   | 2   |
| 183 | 918  | 912  | 7  |  | 930  | 940  | -10 | -2  |
| 184 | 918  | 910  | 8  |  | 929  | 937  | -8  | 0   |
| 185 | 913  | 908  | 6  |  | 929  | 930  | -1  | 2   |
| 186 | 913  | 907  | 6  |  | 929  | 926  | 3   | 4   |
| 187 | 908  | 907  | 1  |  | 922  | 920  | 2   | 2   |
| 188 | 908  | 902  | 5  |  | 922  | 913  | 9   | 7   |
| 189 | 901  | 901  | -1 |  | 912  | 913  | 0   | 0   |
| 190 | 900  | 900  | 0  |  | 912  | 906  | 5   | 3   |
| 191 | 854  | 859  | -5 |  | 847  | 899  | -52 | -28 |
| 192 | 854  | 855  | -2 |  | 846  | 864  | -19 | -10 |
| 193 | 840  | 847  | -7 |  | 845  | 859  | -13 | -10 |

|     |     |     |     |  |     |     |     |     |
|-----|-----|-----|-----|--|-----|-----|-----|-----|
| 194 | 840 | 847 | -7  |  | 844 | 857 | -13 | -10 |
| 195 | 839 | 843 | -4  |  | 844 | 856 | -12 | -8  |
| 196 | 838 | 843 | -4  |  | 842 | 853 | -11 | -8  |
| 197 | 832 | 840 | -8  |  | 834 | 850 | -16 | -12 |
| 198 | 830 | 839 | -9  |  | 832 | 846 | -14 | -12 |
| 199 | 824 | 839 | -15 |  | 829 | 845 | -16 | -15 |
| 200 | 823 | 832 | -9  |  | 827 | 843 | -16 | -12 |
| 201 | 819 | 827 | -8  |  | 826 | 841 | -14 | -11 |
| 202 | 818 | 825 | -7  |  | 826 | 823 | 3   | -2  |
| 203 | 816 | 825 | -9  |  | 818 | 813 | 6   | -2  |
| 204 | 816 | 815 | 0   |  | 818 | 811 | 7   | 3   |
| 205 | 811 | 815 | -4  |  | 815 | 809 | 6   | 1   |
| 206 | 809 | 805 | 3   |  | 815 | 807 | 9   | 6   |
| 207 | 790 | 783 | 6   |  | 802 | 804 | -2  | 2   |
| 208 | 789 | 752 | 37  |  | 801 | 792 | 9   | 23  |
| 209 | 756 | 751 | 5   |  | 760 | 763 | -3  | 1   |
| 210 | 755 | 749 | 6   |  | 759 | 756 | 4   | 5   |
| 211 | 746 | 745 | 1   |  | 758 | 753 | 6   | 4   |
| 212 | 746 | 732 | 14  |  | 757 | 749 | 8   | 11  |
| 213 | 716 | 732 | -15 |  | 719 | 727 | -8  | -12 |
| 214 | 716 | 716 | 0   |  | 718 | 722 | -4  | -2  |
| 215 | 710 | 713 | -3  |  | 713 | 712 | 1   | -1  |
| 216 | 709 | 707 | 2   |  | 712 | 711 | 1   | 2   |
| 217 | 679 | 697 | -18 |  | 688 | 701 | -13 | -15 |
| 218 | 678 | 663 | 15  |  | 688 | 689 | -2  | 7   |
| 219 | 652 | 636 | 16  |  | 633 | 633 | -1  | 8   |
| 220 | 648 | 634 | 14  |  | 633 | 630 | 3   | 8   |
| 221 | 637 | 633 | 4   |  | 631 | 628 | 3   | 4   |
| 222 | 637 | 632 | 4   |  | 631 | 628 | 3   | 4   |
| 223 | 632 | 632 | 0   |  | 629 | 628 | 1   | 0   |
| 224 | 631 | 632 | 0   |  | 626 | 627 | -1  | -1  |
| 225 | 631 | 626 | 5   |  | 624 | 626 | -2  | 1   |
| 226 | 630 | 625 | 6   |  | 623 | 624 | -1  | 2   |

|     |     |     |    |  |     |     |     |     |
|-----|-----|-----|----|--|-----|-----|-----|-----|
| 227 | 627 | 594 | 33 |  | 602 | 599 | 3   | 18  |
| 228 | 626 | 567 | 59 |  | 600 | 580 | 21  | 40  |
| 229 | 571 | 565 | 6  |  | 574 | 579 | -5  | 1   |
| 230 | 570 | 562 | 9  |  | 574 | 576 | -2  | 3   |
| 231 | 562 | 560 | 1  |  | 572 | 571 | 1   | 1   |
| 232 | 562 | 511 | 51 |  | 571 | 567 | 4   | 28  |
| 233 | 550 | 506 | 44 |  | 529 | 563 | -34 | 5   |
| 234 | 549 | 503 | 46 |  | 526 | 516 | 10  | 28  |
| 235 | 526 | 499 | 27 |  | 513 | 504 | 9   | 18  |
| 236 | 525 | 496 | 29 |  | 513 | 502 | 10  | 20  |
| 237 | 504 | 474 | 31 |  | 493 | 501 | -8  | 11  |
| 238 | 503 | 458 | 44 |  | 491 | 499 | -9  | 18  |
| 239 | 467 | 458 | 10 |  | 470 | 482 | -11 | -1  |
| 240 | 467 | 456 | 11 |  | 469 | 465 | 4   | 7   |
| 241 | 458 | 455 | 2  |  | 462 | 461 | 1   | 1   |
| 242 | 457 | 448 | 9  |  | 461 | 459 | 2   | 6   |
| 243 | 448 | 443 | 5  |  | 452 | 459 | -8  | -1  |
| 244 | 447 | 439 | 8  |  | 451 | 456 | -5  | 1   |
| 245 | 442 | 435 | 8  |  | 446 | 445 | 1   | 5   |
| 246 | 439 | 410 | 30 |  | 442 | 441 | 1   | 15  |
| 247 | 364 | 352 | 12 |  | 367 | 439 | -72 | -30 |
| 248 | 362 | 351 | 11 |  | 365 | 438 | -73 | -31 |
| 249 | 357 | 351 | 6  |  | 360 | 352 | 7   | 7   |
| 250 | 357 | 346 | 11 |  | 359 | 351 | 8   | 9   |
